# Supplementary material
Source: ML conference proceedings conference paper supplement (https://openaccess.thecvf.com/content/WACV2022/html/Chung_High_Dynamic_Range_WACV_2022_paper.html)
Supplement: Supplementary file 1 [file Chung_High_Dynamic_Range_WACV_2022_supplemental.pdf]

# High Dynamic Range Imaging of Dynamic Scenes with Saturation Compensation but without Explicit Motion Compensation

## Supplementary Material

Haesoo Chung      Nam Ik Cho

Department of ECE, INMC, Seoul National University, Korea

reneeish@ispl.snu.ac.kr, nicho@snu.ac.kr

### 1. Network Architecture

We illustrate the detailed architecture of the proposed brightness adjustment network (BAN) in Fig. 1. Here, the residual dense blocks (RDBs) [7] have two  $3 \times 3$  convolutional layers with leakyReLU and a  $1 \times 1$  convolution layer without activation. The convolutional layer before kernel generation has 144 channels to produce  $3 \times 3$  kernels for features with 16 channels, and the convolutional layer before offset generation has 18 channels to produce two-dimensional offsets for  $3 \times 3$  grid.

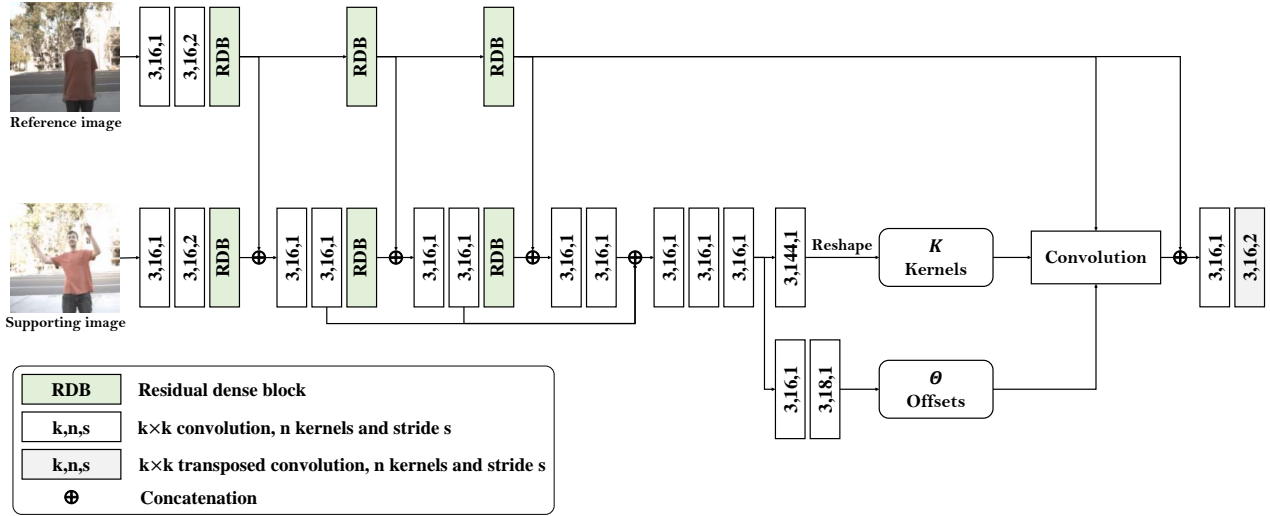

Figure 1: The detailed architecture of the proposed brightness adjustment network (BAN).

### 2. Additional Qualitative Results

This section provides more qualitative results to demonstrate the effectiveness of our method. We compare our visual results on Kalantari *et al.*'s dataset [2] with other state-of-the-art methods [4, 1, 2, 5, 6, 3]. Figs. 2, 3, and 4 demonstrate the ability of our approach to generate detailed texture and suppress color distortions even in the saturated regions with occlusions and motions. Specifically, Fig. 3 shows that our method successfully handles undesirable glow light effects which are commonly observed in real images and produces artifact-free HDR results. The patch-based approaches [4, 1] fail to reconstruct content in the regions where large motions exist. The methods using flow-based alignment [2, 3] introduce distortions which result from flow estimation error. Wu *et al.* [5] and Yan *et al.* [6] struggle to generate details in the severely saturated areas. The overall results show that the proposed method generates high-quality HDR results even in the

presence of saturation and dynamic motions. The artifact regions are pointed by red arrows, which can be better observed by magnification.

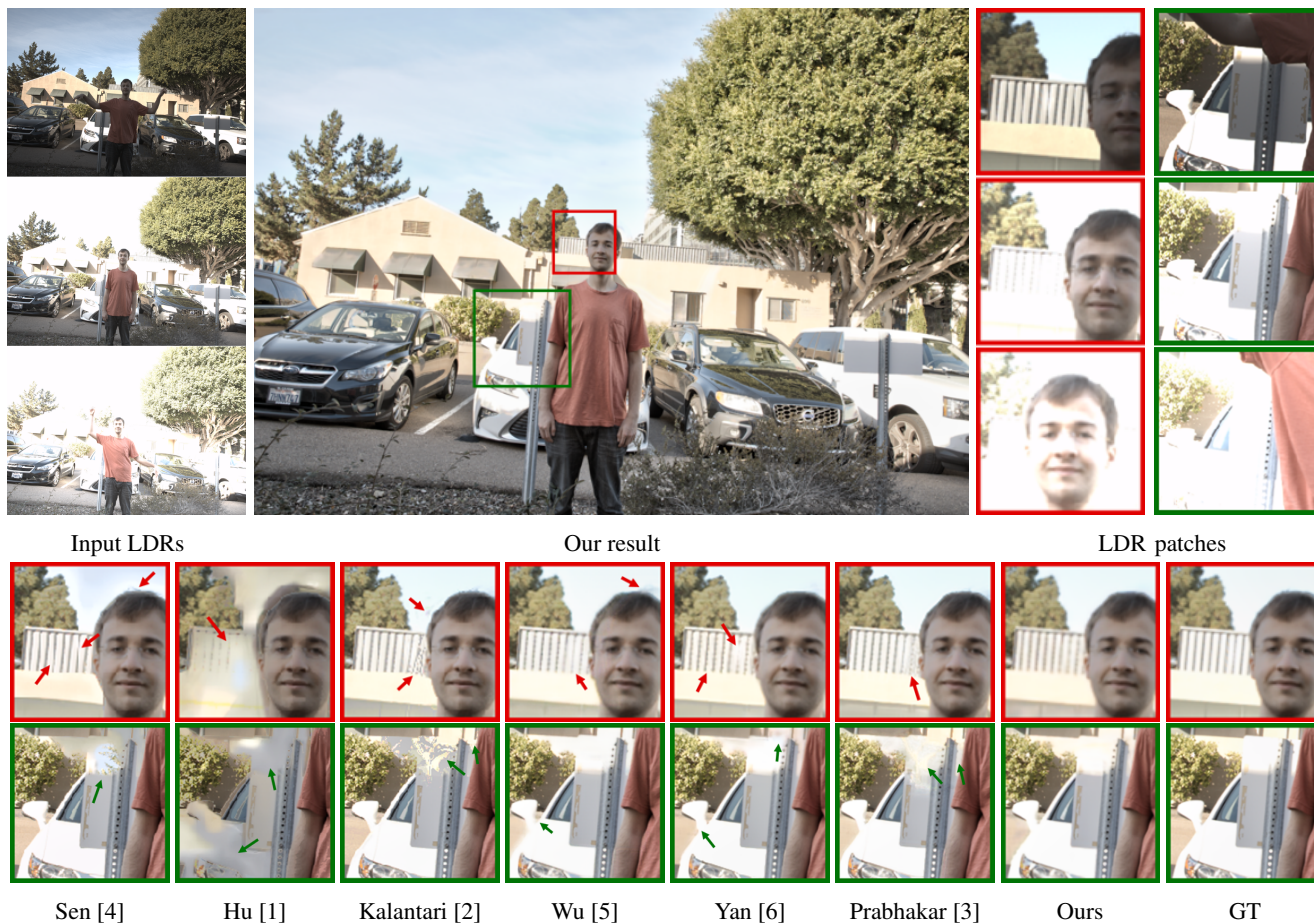

Figure 2: Qualitative comparisons of our method with state-of-the-art methods.

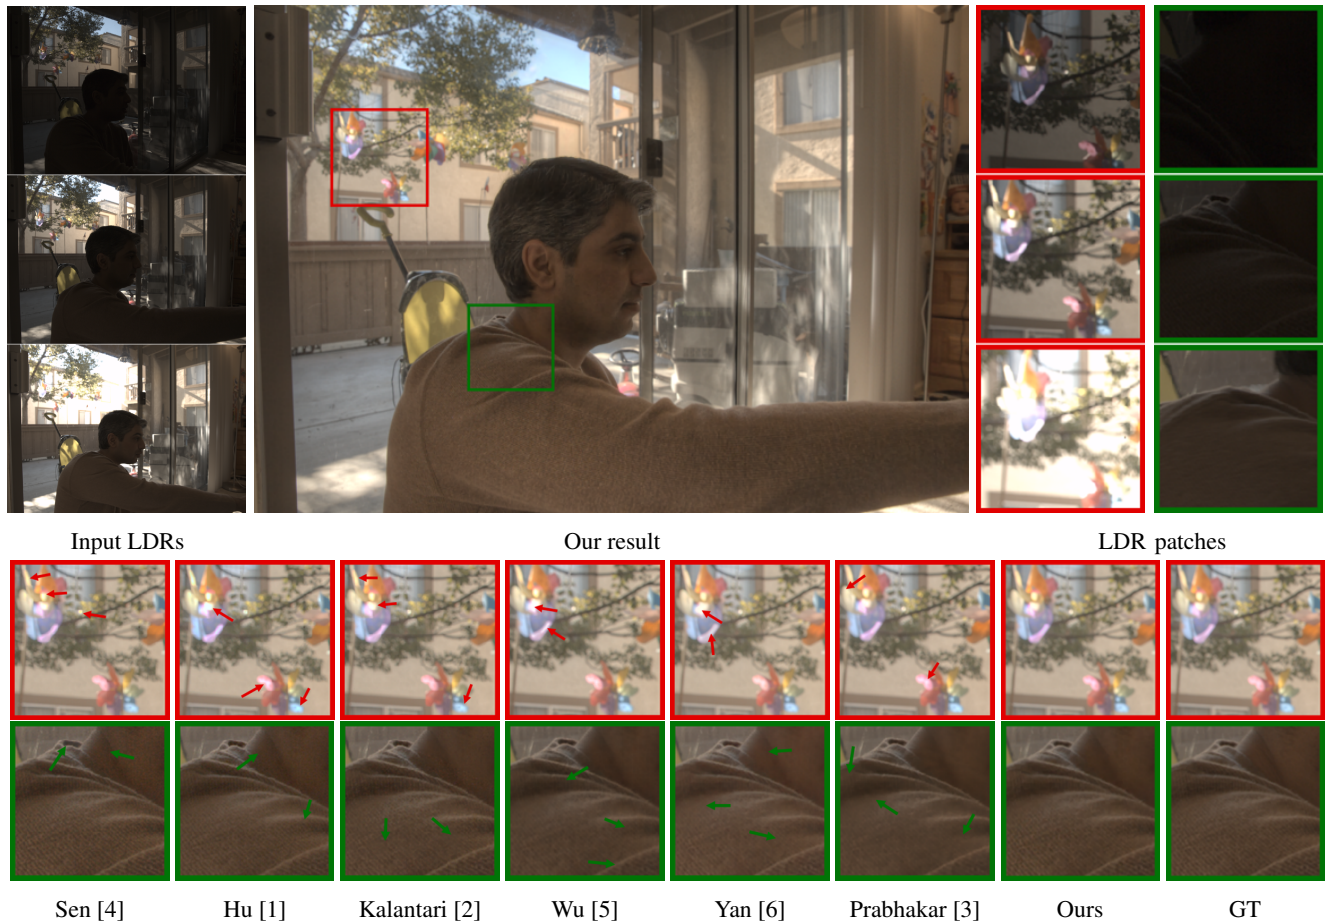

Figure 3: Qualitative comparisons of our method with state-of-the-art methods.

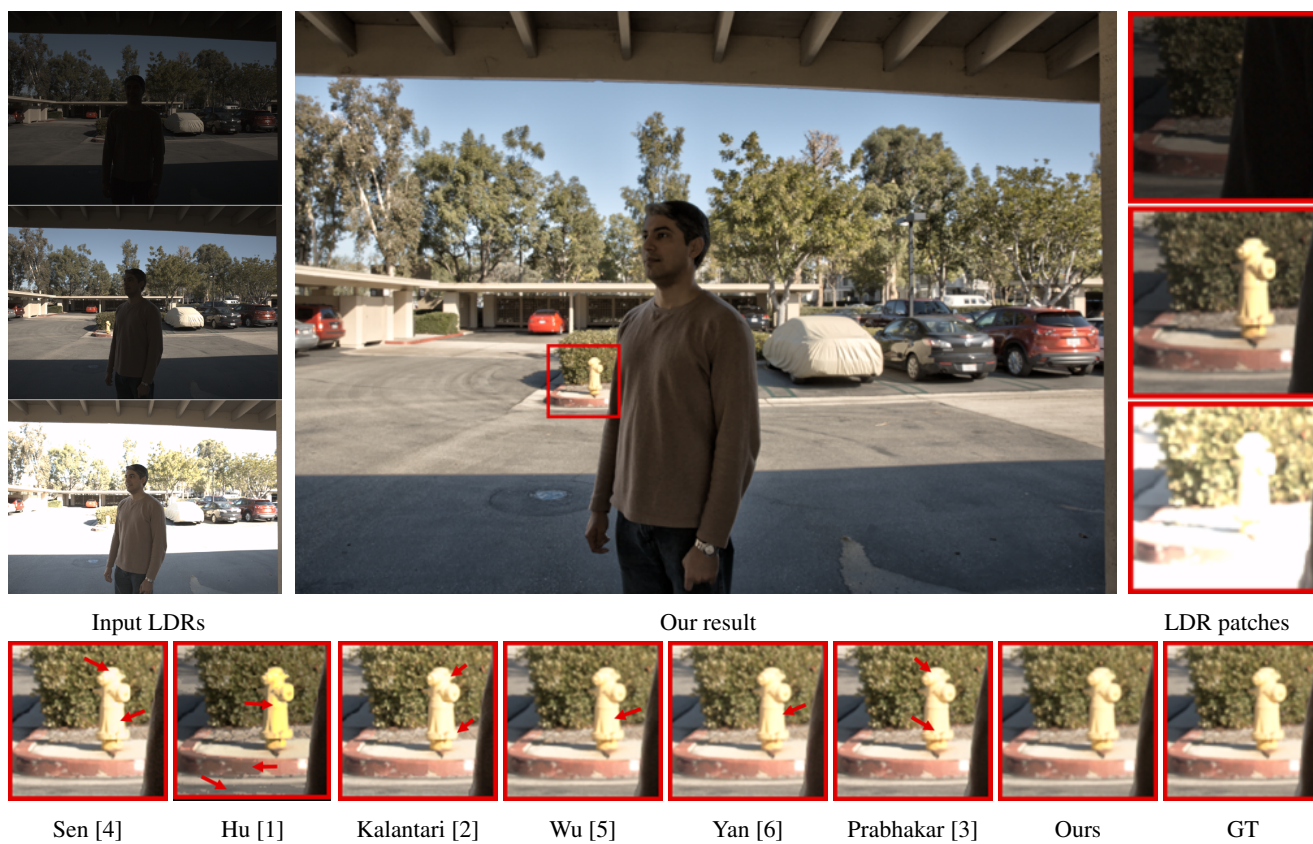

Figure 4: Qualitative comparisons of our method with state-of-the-art methods.

## References

- [1] Jun Hu, Orazio Gallo, Kari Pulli, and Xiaobai Sun. Hdr deghosting: How to deal with saturation? In *Proceedings of the IEEE Conference on Computer Vision and Pattern Recognition*, pages 1163–1170, 2013.
- [2] Nima Khademi Kalantari and Ravi Ramamoorthi. Deep high dynamic range imaging of dynamic scenes. *ACM Trans. Graph.*, 36(4):144–1, 2017.
- [3] K. Ram Prabhakar, Gowtham Senthil, Susmit Agrawal, R. Venkatesh Babu, and Rama Krishna Sai S Gorthi. Labeled from unlabeled: Exploiting unlabeled data for few-shot deep hdr deghosting. In *Proceedings of the IEEE/CVF Conference on Computer Vision and Pattern Recognition (CVPR)*, pages 4875–4885, June 2021.
- [4] Pradeep Sen, Nima Khademi Kalantari, Maziar Yaesoubi, Soheil Darabi, Dan B Goldman, and Eli Shechtman. Robust patch-based hdr reconstruction of dynamic scenes. *ACM Trans. Graph.*, 31(6):203–1, 2012.
- [5] Shangzhe Wu, Jiarui Xu, Yu-Wing Tai, and Chi-Keung Tang. Deep high dynamic range imaging with large foreground motions. In *Proceedings of the European Conference on Computer Vision (ECCV)*, pages 117–132, 2018.
- [6] Qingsen Yan, Dong Gong, Qinfeng Shi, Anton van den Hengel, Chunhua Shen, Ian Reid, and Yanning Zhang. Attention-guided network for ghost-free high dynamic range imaging. *arXiv preprint arXiv:1904.10293*, 2019.
- [7] Yulun Zhang, Yapeng Tian, Yu Kong, Bineng Zhong, and Yun Fu. Residual dense network for image super-resolution. In *Proceedings of the IEEE conference on computer vision and pattern recognition*, pages 2472–2481, 2018.
